# Supplementary material for: Copper chelation in patients with hypertrophic cardiomyopathy
Source: PubMed Central journal article supplement — Open Heart. 2022 Feb 15;9(1):e001803. doi: 10.1136/openhrt-2021-001803 (PMC8852723; doi:10.1136/openhrt-2021-001803), 2022-02-15

## SUPPLEMENTARY DATA

### Table Titles

Table S1: Exclusion Criteria

Table S2: Patient Characteristics

Table S3: Adverse effects leading to non-completion of study

Table S4: Summary of important risks

Table S5: Laboratory and haemodynamic data at baseline and after 6 months of treatment with trientine

Table S6: Echocardiographic data at baseline and after 6 months of treatment with trientine

Table S7: Cardiac MRI at baseline and after 6 months of treatment with trientine.

### Figure Titles and Legends

Figure 1: Study Flow Chart

Figure 2: Case – control comparison in change in LV mass

Figure 3: Change in Extracellular Volume Fraction

Figure 4: Voxel placement in  $^{31}\text{P}$ -CMRS with typical  $^{31}\text{P}$ -CMR spectrum (2,3-DPG = 2,3-diphosphoglycerate, PDE = phosphodiesterase, PCr = phosphocreatine, ATP = adenosine triphosphate). PCR/ATP ratio was calculated as the ratio of amplitudes of the PCr and  $\alpha$ -ATP peaks.

Table S1: Exclusion Criteria

- History of any other cardiovascular disorder
- NYHA Class III / IV heart failure
- Diabetes Mellitus
- Contraindication to magnetic resonance imaging (MRI) scanning (including claustrophobia)
- Known hypersensitivity to Trientine or excipients
- Known hypersensitivity to Gadolinium-based contrast agent
- eGFR < 50ml/min/1.73m<sup>2</sup>
- BMI > 40kg/m<sup>2</sup>
- History of significant malabsorption
- Copper deficiency at baseline
- Iron deficiency at baseline
- Haemoglobin < 10g/dL
- Unresolved haematological disorder
- Severe hepatic impairment
- Untreated thyroid disease
- Autoimmune disorders/connective tissue disease
- Drug or alcohol abuse
- Pregnancy/breast-feeding. Women of childbearing potential (not >2 years post- menopausal and/or not surgically sterilised) must have a negative blood serum pregnancy test, performed at visit 1 prior to administration of study medication
- Any clinically significant or unstable medical or psychiatric condition that would interfere with the patient's ability to participate in the study
- Any other condition, which in the opinion of the research team, may put participants at risk during the study, or which may affect the outcome of the study
- New medication within the preceding month of the study (excluding short term prescriptions)
- Participation in another study involving an investigational product in the previous 12 weeks

Table S2: Patient Characteristics

|                                     | Intervention Group | Control Group | p-value |
|-------------------------------------|--------------------|---------------|---------|
| Age (years)                         | 55.5 ± 8.4         | 54.7 ± 13.3   | 0.86    |
| Male                                | 15                 | 7             |         |
| Body surface area (m <sup>2</sup> ) | 2.06 ± 0.25        | 1.94 ± 0.24   | 0.24    |
| Systolic blood pressure (mmHg)      | 130 ± 15           | 137 ± 13      | 0.24    |
| Diastolic blood Pressure (mmHg)     | 81 ± 12            | 75 ± 15       | 0.28    |
| Heart Rate                          | 66.5 ± 16.3        | 65.1 ± 11.5   | 0.81    |
| ACEi / ARB                          | 1                  | 2             |         |
| Beta-blockers                       | 10                 | 5             |         |
| Calcium Channel Blockers            | 1                  | 0             |         |
| Spironolactone                      | 0                  | 0             |         |
| PCr/ATP ratio                       | 1.27 ± 0.44        | 1.51 ± 0.82   | 0.36    |
| NYHA I                              | 14                 | 7             |         |
| NYHA II                             | 6                  | 3             |         |
| EF (%)                              | 69.0 ± 6.8         | 69.8 ± 8.3    | 0.79    |
| Mass/BSA (g/m <sup>2</sup> )        | 73.5 ± 20.0        | 79.8 ± 18.6   | 0.43    |

Table S3: Adverse effects leading to non-completion of study

|   | Gender | Length of Treatment (weeks) | Adverse Effect          |
|---|--------|-----------------------------|-------------------------|
| 1 | Male   | 1                           | Abdominal bloating      |
| 2 | Male   | 21                          | Oesophageal ulcer*      |
| 3 | Male   | 20                          | Arthralgia <sup>†</sup> |
| 4 | Male   | 4                           | Migraine <sup>†</sup>   |

\* Related to tablet impaction- the patient was taking multiple other prescribed and over the counter medications, and the investigational medicinal product (IMP) was not deemed the culprit at OGD.

<sup>†</sup> Pre-existing prior to study

Table S4: Summary of important risks

| <b>Adverse Event</b>                                                      | <b>Number of patients experiencing adverse event<br/>(Total number of patients = 20)</b> |
|---------------------------------------------------------------------------|------------------------------------------------------------------------------------------|
| Gastric complaints (nausea, gastric pain, bloating, diarrhoea, dyspepsia) | 5                                                                                        |
| Dizziness                                                                 | 2                                                                                        |
| Increased exercise capacity                                               | 2                                                                                        |
| Chest infection                                                           | 3                                                                                        |
| Increased Urinary Frequency                                               | 1                                                                                        |
| Leukopenia                                                                | 1                                                                                        |
| Vivid dreams                                                              | 1                                                                                        |
| Appendicitis*                                                             | 1                                                                                        |
| Headache                                                                  | 2                                                                                        |
| Influenza-like illness                                                    | 1                                                                                        |
| Common Cold                                                               | 1                                                                                        |
| Vivid dreams                                                              | 1                                                                                        |
| Palpitations requiring admission*                                         | 1                                                                                        |
| Wrist Sprain*                                                             | 1                                                                                        |
| Adhesive capsulitis of the shoulder                                       | 1                                                                                        |

\*Serious adverse event

Table S5: Laboratory and haemodynamic data at baseline and after 6 months of treatment with trientine

|                                         | Baseline     | Follow-up    | p-value |
|-----------------------------------------|--------------|--------------|---------|
| <i>Laboratory data</i>                  |              |              |         |
| Haemoglobin (g/l)                       | 145.5 ± 13.3 | 143.2 ± 12.5 | 0.40    |
| Urea (mmol/l)                           | 5.1 ± 1.0    | 4.9 ± 1.2    | 0.25    |
| Creatinine (µmol/l)                     | 75.0 ± 13.0  | 74.2 ± 11.7  | 0.71    |
| eGFR (ml/min/1.73m <sup>2</sup> )       | 82.7 ± 8.6   | 84.5 ± 7.2   | 0.30    |
| Alk. Phos (iu/l)                        | 73.0 ± 19.8  | 78.6 ± 19.1  | 0.03    |
| ALT (iu/l)                              | 20.5 ± 6.4   | 23.6 ± 5.0   | 0.07    |
| Magnesium (mmol/l)                      | 0.87 ± 0.08  | 0.81 ± 0.12  | 0.14    |
| Serum Copper (µmol/l)                   | 16.5 ± 2.3   | 16.6 ± 2.7   | 0.83    |
| Serum Caeruloplasmin (g/l)              | 0.23 ± 0.03  | 0.24 ± 0.03  | 0.04    |
| Serum Zinc (µmol/l)                     | 20.4 ± 5.4   | 25.3 ± 7.9   | 0.15    |
| <i>Haemodynamics</i>                    |              |              |         |
| Systolic BP (mmHg)                      | 131 ± 15     | 125 ± 15     | 0.21    |
| Diastolic BP (mmHg)                     | 83 ± 14      | 74 ± 7       | 0.06    |
| Heart Rate (bpm)                        | 57.5 ± 10.0  | 58.8 ± 9.2   | 0.59    |
| BSA (m <sup>2</sup> )                   | 2.07 ± 0.28  | 2.06 ± 0.28  | 0.43    |
| <i>Cardiopulmonary Exercise Testing</i> |              |              |         |
| Exercise time (min)                     | 14.7 ± 3.2   | 14.4 ± 2.9   | 0.26    |
| Anaerobic Threshold (l/mn)              | 1.41 ± 0.46  | 1.47 ± 0.36  | 0.89    |
| VO <sub>2</sub> Max (l/mn)              | 2.44 ± 0.81  | 2.41 ± 0.74  | 0.46    |
| PR interval (ms)                        | 184 ± 20     | 182 ± 19     | 0.42    |
| QRS duration (ms)                       | 110 ± 12     | 109 ± 13     | 0.44    |
| QTc (ms)                                | 432 ± 27     | 429 ± 20     | 0.75    |

Table S6: Echocardiographic data at baseline and after 6 months of treatment with trientine

|                         | Baseline    | Follow-up   | p-value |
|-------------------------|-------------|-------------|---------|
| E velocity (cm/s)       | 60.8 ± 16.7 | 61.8 ± 12.9 | 0.67    |
| A velocity (cm/s)       | 64.4 ± 23.0 | 63.7 ± 20.3 | 0.77    |
| E/A ratio               | 1.11 ± 0.67 | 1.10 ± 0.50 | 0.84    |
| Mean S' Velocity (cm/s) | 6.9 ± 2.5   | 8.1 ± 1.9   | 0.03    |
| Mean E' Velocity (cm/s) | 6.8 ± 3.4   | 7.0 ± 2.5   | 0.71    |
| Mean A' Velocity (cm/s) | 7.4 ± 3.1   | 8.4 ± 2.7   | 0.11    |
| Mean E/E'               | 10.7 ± 3.3  | 10.1 ± 3.2  | 0.43    |
| Mitral Decel. Time (ms) | 295 ± 79    | 265 ± 47    | 0.11    |

Table S7: Cardiac MRI at baseline and after 6 months of treatment with trientine.

|                                                   | Baseline     | Follow-up    | p-value |
|---------------------------------------------------|--------------|--------------|---------|
| <i>Cardiac MRI: Left ventricle</i>                |              |              |         |
| LVEDV (ml)                                        | 171 ± 36     | 169 ± 38     | 0.57    |
| LVESV (ml)                                        | 54 ± 20      | 52 ± 20      | 0.41    |
| SV (ml)                                           | 117 ± 22     | 117 ± 23     | 0.98    |
| EF (%)                                            | 69 ± 7       | 70 ± 6       | 0.55    |
| LVM (g)                                           | 152 ± 54     | 147 ± 55     | 0.06    |
| LVEDVi (ml/m <sup>2</sup> )                       | 84 ± 10      | 84 ± 12      | 0.84    |
| LVESVi (ml/m <sup>2</sup> )                       | 26 ± 7       | 26 ± 8       | 0.62    |
| SVi (ml/m <sup>2</sup> )                          | 58 ± 9       | 59 ± 8       | 0.75    |
| LVMi (g/m <sup>2</sup> )                          | 73 ± 20      | 73 ± 22      | 0.48    |
| Native septal T1 (ms)                             | 1060 ± 47    | 1049 ± 42    | 0.06    |
| ECV Fraction (%)                                  | 30.0 ± 4.5   | 29.5 ± 4.0   | 0.06    |
| Total Myocardial Volume (ml)                      | 145 ± 52     | 140 ± 53     | 0.05    |
| ECM Volume (ml)                                   | 44 ± 18      | 42 ± 17      | 0.04    |
| Cellular Volume (ml)                              | 101 ± 36     | 99 ± 37      | 0.11    |
| GLS                                               | -18.3 ± 3.4  | -19.4 ± 3.4  | 0.03    |
| PCr / ATP Ratio                                   | 1.27 ± 0.44  | 1.4 ± 0.39   | 0.46    |
| <i>Cardiac MRI: Left atrium</i>                   |              |              |         |
| LAESV (ml)                                        | 75.8 ± 43.6  | 65.8 ± 40.9  | 0.04    |
| LAEDV (ml)                                        | 124.4 ± 51.3 | 114.6 ± 47.3 | 0.18    |
| Pre-atrial contraction vol (ml)                   | 102.9 ± 46.7 | 93.3 ± 40.1  | 0.08    |
| LAESVi (ml/m <sup>2</sup> )                       | 37.3 ± 17.9  | 32.6 ± 17.4  | 0.06    |
| LAEDVi (ml/m <sup>2</sup> )                       | 61.7 ± 21.9  | 57.4 ± 20.8  | 0.25    |
| Pre-atrial contraction vol i (ml/m <sup>2</sup> ) | 50.9 ± 19.8  | 46.6 ± 17.2  | 0.12    |
| Total EF (%)                                      | 41.3 ± 8.3   | 45.5 ± 12.2  | 0.07    |
| Passive EF (%)                                    | 18.0 ± 5.8   | 18.7 ± 4.9   | 0.64    |
| Booster EF (%)                                    | 28.4 ± 8.9   | 33.2 ± 13.6  | 0.16    |
| LA Expansion Index                                | 0.73 ± 0.22  | 0.94 ± 0.54  | 0.09    |
| Total strain (%)                                  | 20.0 ± 3.9   | 21.5 ± 5.0   | 0.04    |
| Peak systolic strain rate (-1)                    | 0.75 ± 13    | 0.83 ± 0.19  | 0.11    |
| Passive Strain (%)                                | 9.47 ± 3.06  | 11.1 ± 5.60  | 0.68    |
| Peak early negative strain rate (-1)              | -0.50 ± 0.29 | -0.49 ± 0.23 | 0.56    |
| Active Strain (%)                                 | 10.53 ± 3.08 | 10.41 ± 4.20 | 0.76    |
| Peak late negative strain rate (-1)               | -0.68 ± 0.20 | -0.66 ± 0.30 | 0.91    |

ECV fraction was calculated as  $ECV = (1 - \text{hematocrit}) \times \lambda$ , where  $\lambda$  is the partition coefficient. Total myocardial volume was  $LV \text{ Mass} / 1.05$ . The total extracellular volume (ECM) was calculated with the formula  $ECM = ECV \times LVM / 1.05$ , while the cellular volume was calculated as  $\text{Cellular volume (ml)} = \text{Total myocardial volume} - \text{ECM volume}$ .



Figure 1

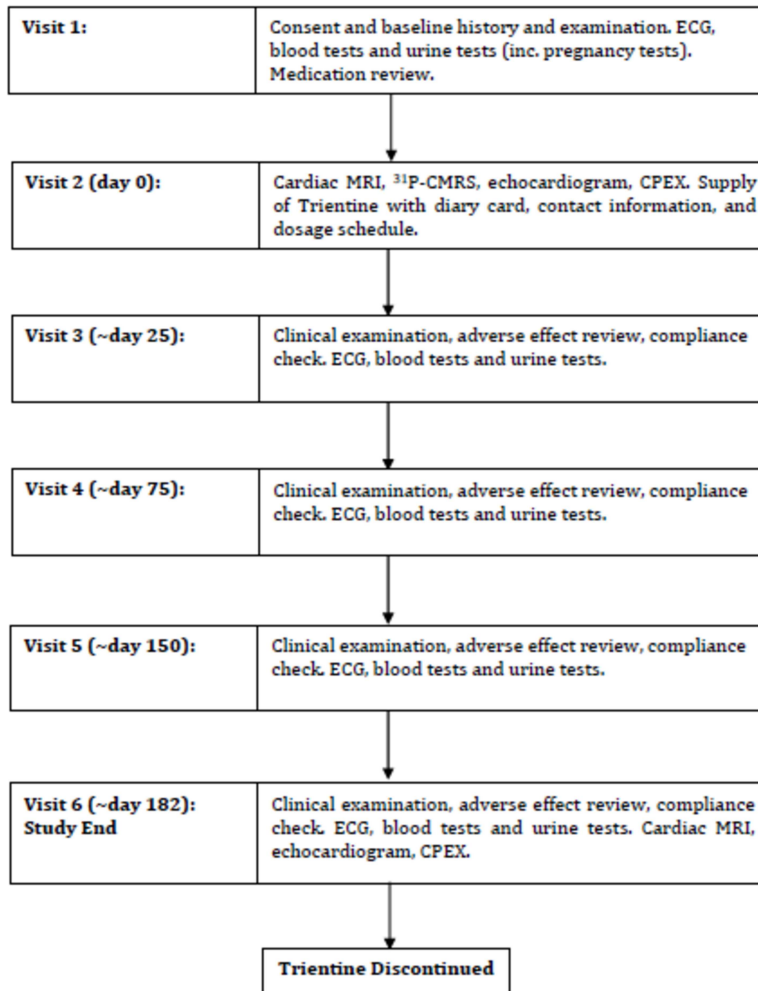

Figure 2

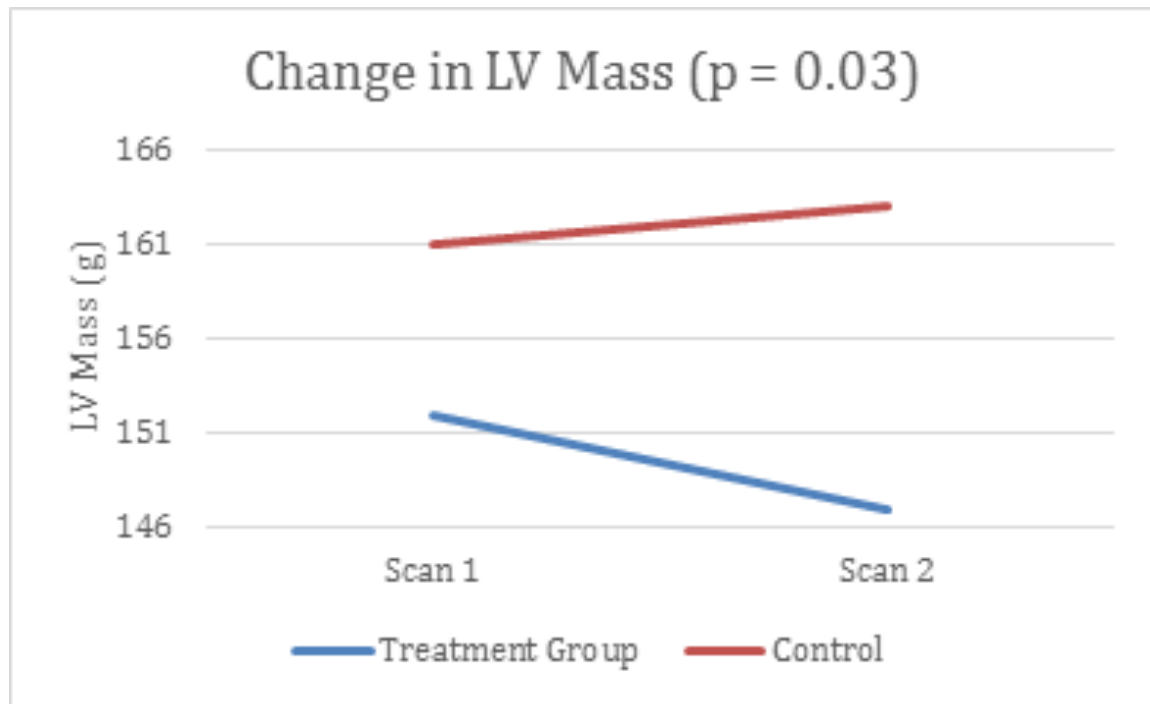

Figure 3

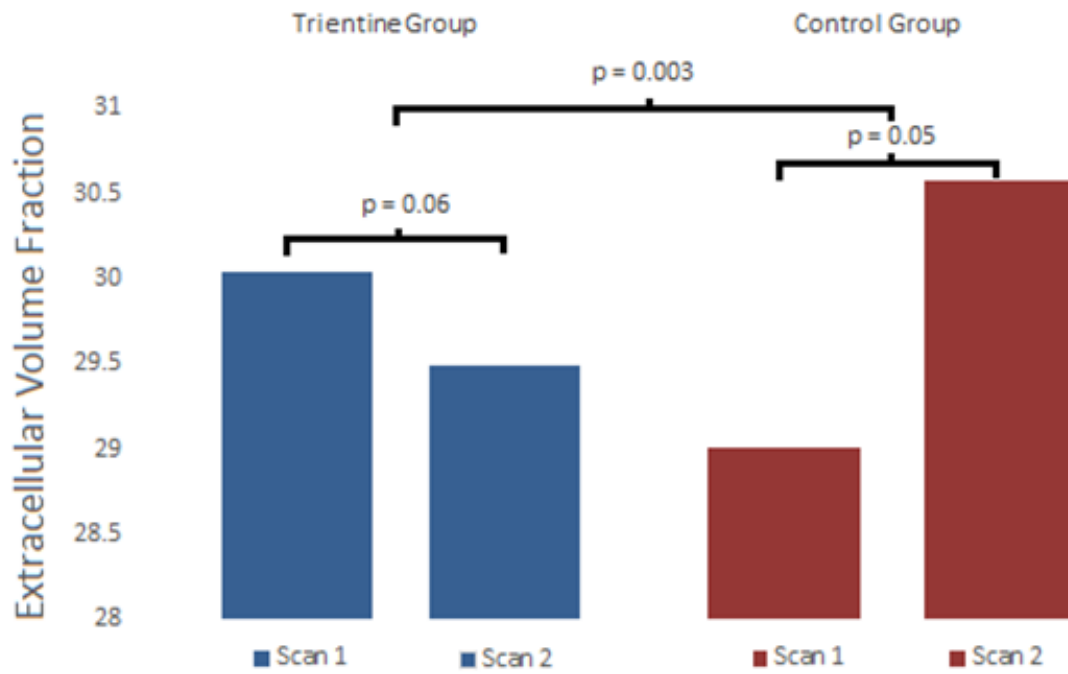

Figure 4

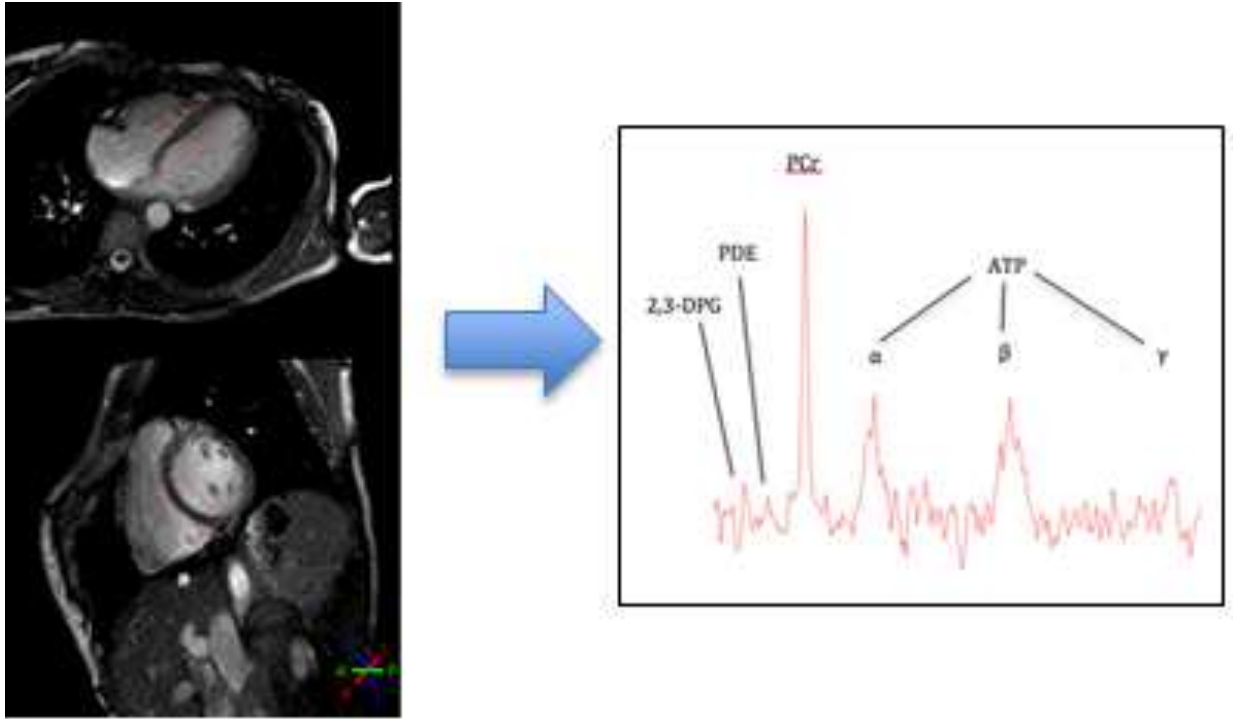

Supplement: openhrt-2021-001803supp001.pdf [file openhrt-2021-001803supp001.pdf]
